# Supplementary material for: Characterization of Flower-Bud Transcriptome and Development of Genic SSR Markers in Asian Lotus (Nelumbo nucifera Gaertn.)
Source: PLoS One. 2014 Nov 7;9(11):e112223. doi: 10.1371/journal.pone.0112223 (PMC4224446; doi:10.1371/journal.pone.0112223)
Supplement: Table S1 — Transcripts related to flower development in Nelumbo . (XLSX) [file pone.0112223.s001.xlsx]

## Sheet: Sheet 1
Table S1 Transcripts related to flower development in Nelumbo
No.	Query Seq_id	Length (bp)	Subject ID	Sequence description	E-value	Percentage of identical matches	Homologous Species
Anthocyanin Biosynthesis pathway
1	PAL(4)
	hx_isotig01265	937	gi|255581751|ref|XP_002531677.1|	Phenylalanine ammonia-lyase	0	93	Ricinus communis
	hx_isotig01334	833	gi|156118600|gb|ABU49842.1|	Phenylalanine ammonia-lyase	1e-136	81	Ginkgo biloba
	hx_isotig05833	718	gi|224100783|ref|XP_002312013.1|	phenylalanine amonnia lyase	9e-161	93.8	Populus trichocarpa
	hx_isotig36751	353	gi|255556976|ref|XP_002519521.1|	Phenylalanine ammonia-lyase	3e-41	85.11	Ricinus communis
2	C4H (2)
	hx_isotig01953	737	gi|255565927|ref|XP_002523952.1|	Cinnamate 4-hydroxylase, putative	8e-139	96.07	Ricinus communis
	hx_isotig05423	462	gi|98283650|gb|ABF58026.1|	Cinnamate-4-hydroxylate-like	2e-102	95	Hibiscus cannabinus
3	4CL (1)	1个
	hx_isotig12991	718	gi|355513994|gb|AES95617.1|	4-coumarate-CoA ligase	3e-33	56.16	Medicago truncatula
4	CHS (4)	5个
	hx_isotig00454	848	gi|3288721|dbj|BAA31259.1|	Chalcone synthase	0	94.15	Vitis vinifera
	hx_isotig06423	1070	gi|291067091|gb|ADD74169.1|	Chalcone synthase	2e-135	99.62	Nelumbo nucifera
	hx_isotig06838	1035	gi|291067089|gb|ADD74168.1|	Chalcone synthase	2e-136	100	Nelumbo nucifera
	hx_isotig25966	478	gi|291067089|gb|ADD74168.1|	Chalcone synthase	8e-65	99.19	Nelumbo nucifera
5	CHI (8)	9个
	hx_isotig00424	848	gi|295687229|gb|ADG27840.1|	Chalcone isomerase	2e-74	81.41	Gossypium hirsutum
	hx_isotig08114	945	gi|340396634|gb|AEK32592.1|	Chalcone isomerase	2e-95	81.11	Paeonia lactiflora
	hx_isotig12254	739	gi|325551315|gb|ADZ28513.1|	Chalcone isomerase	9e-79	81.36	Camellia nitidissima
	hx_isotig26368	473	gi|295687229|gb|ADG27840.1|	Chalcone isomerase	2e-45	82.24	Gossypium hirsutum
	hx_isotig19695	567	gi|113202134|gb|ABI33225.1|	Chalcone isomerase	3e-65	73.53	Camellia sinensis
	hx_isotig20835	547	gi|5921722|sp|O65333.1|CFI_ELAUM	RecName: Full=Chalcone--flavonone isomerase; Short=Chalcone isomerase	6e-45	57.39	Elaeagnus umbellata
	hx_HCPISSG01BOP0Z	384	gi|344259343|gb|AEN03361.1|	Chalcone isomerase	2e-18	60.24	Narcissus tazetta var. chinensis
	hx_HCPISSG02IQU3R	347	gi|158513327|sp|A5HBK6.1|CFI_PYRCO	RecName: Full=Chalcone--flavonone isomerase; Short=Chalcone isomerase	8e-15	64.52	Pyrus communis
6	F3H (2)	2个
	hx_isotig09803	843	gi|255563204|ref|XP_002522605.1|	Flavonol synthase/flavanone 3-hydroxylase	3e-106	70.82	Ricinus communis
	hx_isotig15067	661	gi|355490128|gb|AES71331.1|	Flavonol synthase/flavanone 3-hydroxylase	5e-65	71.15	Medicago truncatula
7	F3'5'H (2)	2个
	hx_isotig00432	707	gi|111144659|gb|ABH06585.1|	Flavonoid 3'5' hydroxylase	6e-123	83.33	Vitis vinifera
	hx_isotig11324	540	gi|30421433|gb|AAP31058.1|	Flavonoid 3',5'-hydroxylase	5e-113	83.54	Gossypium hirsutum
8	F3'H (2)	2个
	hx_isotig03058	647	gi|325551319|gb|ADZ28515.1|	Flavonoid-3'-hydroxylase	0	82.76	Camellia nitidissima
	hx_isotig31408	419	gi|255291814|dbj|BAH89259.1|	Putative flavonoid 3'-hydroxylase	1e-20	76.56	Diospyros kaki
9	DFR (2)	2个
	hx_isotig20805	544	gi|345105429|gb|AEN71545.1|	Dihydroflavonol 4-reductase	3e-31	62.77	Paeonia suffruticosa
	hx_isotig17288	610	gi|77455578|gb|ABA86595.1|	Dihydroflavonol 4-reductase	8e-26	72.73	Aquilegia formosa
10	FLS (3)	3个
	hx_isotig03228	1439	gi|29123532|gb|AAO63023.1|	Flavonol synthase	3e-146	75.22	Allium cepa
	hx_isotig05902	591	gi|76786311|gb|ABA54917.1|	Flavonol synthase	6e-107	73.21	Camellia sinensis
	hx_isotig27521	462	gi|76786311|gb|ABA54917.1|	Flavonol synthase	1e-40	78.22	Camellia sinensis
11	ANS/LDOX (3)	3个
	hx_isotig04250	690	gi|255554713|ref|XP_002518394.1|	Leucoanthocyanidin dioxygenase, putative	1e-118	65.23	Ricinus communis
	hx_isotig04687	1238	gi|225426722|ref|XP_002282039.1|	PREDICTED: leucoanthocyanidin dioxygenase	3e-143	83.67	Vitis vinifera
	hx_HCPISSG01COYHV	339	gi|255585926|ref|XP_002533635.1|	Leucoanthocyanidin dioxygenase, putative	4e-12	63.33	Ricinus communis
12	UFGT (12)	13个
	hx_isotig01727	1018	gi|209954731|dbj|BAG80556.1|	UDP-glucose:glucosyltransferase	2e-179	69.98	Lycium barbarum
	hx_isotig02280	1677	gi|13620861|dbj|BAB41020.1|	UDP-glucose:flavonoid 3-O-glucosyltransferase	6e-153	59.07	Vitis vinifera
	hx_isotig02539	943	gi|206584972|gb|ACI15395.1|	UDP-glucose: flavonoid 3-O-glucosyltransferase	1e-127	55.87	Vitis amurensis
	hx_isotig04452	1263	gi|255544782|ref|XP_002513452.1|	UDP-glucosyltransferase, putative	1e-159	63.16	Ricinus communis
	hx_isotig05371	1157	gi|255547075|ref|XP_002514595.1|	UDP-glucosyltransferase, putative	1e-98	60.09	Ricinus communis
	hx_isotig11087	486	gi|355482723|gb|AES63926.1|	Anthocyanidin 3-O-glucosyltransferase	8e-82	59.67	Medicago truncatula
	hx_isotig17699	603	gi|255584327|ref|XP_002532899.1|	UDP-glucosyltransferase, putative	1e-46	53.23	Ricinus communis
	hx_isotig22622	517	gi|255576054|ref|XP_002528922.1|	glucosyltransferase, putative	4e-59	74.12	Ricinus communis
	hx_isotig19538	570	gi|24459979|dbj|BAC22617.1|	UDP-glucose:sterol 3-O-glucosyltransferase	5e-40	74.76	Panax ginseng
	hx_isotig19876	564	gi|255563008|ref|XP_002522508.1|	UDP-glucosyltransferase, putative	4e-51	64.79	Ricinus communis
	hx_isotig20201	554	gi|342306022|dbj|BAK55747.1|	UDP-glucose glucosyltransferase	9e-62	66.67	Gardenia jasminoides
	hx_isotig23640	502	gi|255564531|ref|XP_002523261.1|	UDP-glucosyltransferase, putative	4e-40	59.03	Ricinus communis
13	MT (4)	4个
	hx_isotig03338	673	gi|7332271|gb|AAF60951.1|	O-methyltransferase	3e-166	80.49	Populus trichocarpa × Populus deltoides
	hx_isotig37642	340	gi|255555405|ref|XP_002518739.1|	O-methyltransferase	3e-19	71.21	Ricinus communis
	hx_isotig29709	437	gi|255548155|ref|XP_002515134.1|	O-methyltransferase	1e-15	82.35	Ricinus communis
	hx_isotig37642	340	gi|255555405|ref|XP_002518739.1|	O-methyltransferase	3e-19	71.21	Ricinus communis
14	AT (7)	7个
	hx_isotig07832	471	gi|255536849|ref|XP_002509491.1|	Acyltransferase, putative	3e-151	90.97	Ricinus communis
	hx_isotig12447	735	gi|133874200|dbj|BAF49303.1|	Acyltransferase	1e-84	73.71	Clitoria ternatea
	hx_isotig14849	665	gi|255538658|ref|XP_002510394.1|	Acyltransferase, putative	9e-74	77.51	Ricinus communis
	hx_isotig21987	528	gi|255550233|ref|XP_002516167.1|	Acyltransferase, putative	2e-23	79.1	Ricinus communis
	hx_isotig26735	470	gi|226946164|ref|YP_002801237.1|	Acyltransferase	1e-17	70.49	Azotobacter vinelandii
	hx_isotig28586	450	gi|255573400|ref|XP_002527626.1|	Anthocyanin 5-aromatic acyltransferase, putative	1e-14	60	Ricinus communis
	hx_HCPISSG02FJT7O	364	gi|255550233|ref|XP_002516167.1|	Acyltransferase, putative	2e-32	75	Ricinus communis
15	GST (9)	（待定）	（9个）
	hx_isotig00957	970	gi|161347485|gb|ABX65441.1|	Glutathione S-transferase	4e-95	77.67	Chimonanthus praecox
	hx_isotig06459	1062	gi|255584168|ref|XP_002532823.1|	Glutathione S-transferase, putative	5e-105	81.28	Ricinus communis
	hx_isotig07132	528	gi|259479222|dbj|BAI40146.1|	Glutathione S-transferase 1	3e-87	69.87	Diospyros kaki
	hx_isotig07719	485	gi|255541314|ref|XP_002511721.1|	Glutathione-S-transferase theta, gst, putative	5e-77	76.56	Ricinus communis
	hx_isotig11227	777	gi|192910866|gb|ACF06541.1|	Glutathione S-transferase	1e-30	83.33	Elaeis guineensis
	hx_isotig22936	515	gi|118406886|gb|ABK81651.1|	Glutathione S-transferase	2e-13	76	Vitis vinifera
	hx_isotig35881	366	gi|11132235|sp|P57108.1|GSTZ_EUPES	RecName: Full=Glutathione S-transferase zeta class	6e-25	67.82	Euphorbia esula
	hx_isotig41389	266	gi|255554288|ref|XP_002518184.1|	Glutathione S-transferase, putative	1e-33	76.14	Ricinus communis
	hx_HCPISSG01AU802	347	gi|255571208|ref|XP_002526554.1|	Glutathione transferase, putative	5e-31	61.86	Ricinus communis
Carotenoid biosynthesis pathway
16	IPI (1)
	hx_isotig04176	395	gi|6225525|sp|O48964.1|IDI1_CAMAC	Isopentenyl pyrophosphate isomerase I; Short=IPP isomerase I	8e-124	91.45	Camptotheca acuminata
17	GGDP (2)
	hx_isotig03291	645	gi|157965847|gb|ABW06960.1|	geranylgeranyl diphosphate synthase	9e-141	76.69	Corylus avellana
	hx_isotig32961	400	gi|38455333|gb|AAR20832.1|	geranylgeranyl diphosphate synthase	4e-40	68.09	Taxus × media
18	PSY (2)
	hx_isotig08286	935	gi|262292933|gb|ACY42669.1|	phytoene synthase 2	2e-125	88.71	Manihot esculenta
	hx_HCPISSG02FS5O1	391	gi|238836224|gb|ACR61392.1|	phytoene synthase protein	7e-49	80.77	Fragaria × ananassa
19	PDS (1)
	hx_isotig23273	510	gi|18146805|dbj|BAB82461.1|	phytoene desaturase	9e-25	56.1	Gentiana lutea
20	ZDS (2)
	hx_isotig06381	1075	gi|334199824|gb|AEG73891.1|	zeta-carotene desaturase	5e-129	84.33	Nicotiana tabacum
	hx_isotig23673	506	gi|17367473|sp|O49901.1|ZDS_NARPS	Zeta-carotene desaturase, chloroplastic/chromoplastic	5e-84	91.67	Narcissus pseudonarcissus
21	LCYB (2)
	hx_isotig36846	352	gi|221706340|gb|ACM24791.1|	lycopene beta-cyclase	9e-27	89.23	Carica papaya
	hx_HCPISSG02H2AQ8	328	gi|12746305|gb|AAK07430.1|AF321534_1	lycopene beta-cyclase	3e-52	91.74	Adonis aestivalis var. palaestina
22	ZEP (2)
	hx_isotig12574	731	gi|5902707|sp|Q40412.1|ABA2_NICPL	Zeaxanthin epoxidase, chloroplastic	3e-53	70.07	Nicotiana plumbaginifolia
	hx_isotig30578	427	gi|255565190|ref|XP_002523587.1|	zeaxanthin epoxidase, putative	2e-61	80.58	Ricinus communis
23	CRTISO (1)
	hx_isotig27464	462	gi|219807170|dbj|BAH10589.1|	carotenoid isomerase	1e-72	88.59	Lilium hybrid division I
24	NCED (2)
	hx_isotig00236	1437	gi|134285450|gb|ABO69703.1|	9-cis-epoxycarotenoid dioxygenase	0	79.1	Castanea mollissima
	hx_isotig12561	730	gi|334361424|gb|AEG78287.1|	9-cis-epoxycarotenoid dioxygenase	1e-18	63.86	Gladiolus hybrid cultivar
Specification of floral organ identity
25	AP1 (2)
	hx_isotig04319	644	gi|290465695|gb|ADD25192.1|	Transcription factor apetala 1	4e-86	100	Nelumbo nucifera
	hx_isotig40986	275	gi|290465695|gb|ADD25192.1|	Transcription factor apetala 1	7e-25	80.65	Nelumbo nucifera
26	AP2 (1)
	hx_isotig27517	462	gi|56567285|gb|AAV98627.1|	Transcription factor apetala 2	1e-75	91.56	Elaeis guineensis
	AP3 (2)
	hx_isotig09551	333	gi|290465697|gb|ADD25193.1|	AP3-like protein AP3	2e-85	100	Nelumbo nucifera
	hx_isotig09957	376	gi|290465699|gb|ADD25194.1|	AP3-like protein AP3	3e-86	80	Nelumbo nucifera
27	PI (1)
	hx_isotig24725	491	gi|48727608|gb|AAT46101.1|	PISTILLATA-like protein	5e-27	85.92	Akebia trifoliata
28	AG (2)
	hx_isotig05253	338	gi|42794560|gb|AAS45686.1|	AG protein	3e-100	90.67	Meliosma dilleniifolia
	hx_isotig05483	343	gi|290465687|gb|ADD25188.1|	AG protein	7e-113	100	Nelumbo nucifera
29	AGL6 (2)
	hx_isotig06523	586	gi|290465689|gb|ADD25189.1|	Agamous-like mads box protein 6	1e-123	98.24	Nelumbo nucifera
	hx_isotig36391	359	gi|290465689|gb|ADD25189.1|	Agamous-like mads box protein 6	3e-33	100	Nelumbo nucifera
30	SEP (2)
	hx_isotig03972	221	gi|313907147|gb|ADR83588.1|	Sepallata 1-like protein	6e-119	90.57	Platanus × acerifolia
	hx_isotig03580	470	gi|290465693|gb|ADD25191.1|	Sepallata 3-like protein	8e-126	100	Nelumbo nucifera
Photoperiod pathway
31	PHY (12)
	hx_isotig09213	876	gi|183239022|gb|ACC60969.1|	phytochrome A	5e-52	73.29	Vitis riparia
	hx_isotig40260	291	gi|183239022|gb|ACC60969.1|	phytochrome A	1e-31	80	Vitis riparia
	hx_isotig13754	695	gi|12231335|gb|AAG49048.1|AF216091_1	phytochrome B	3e-121	92.64	Averrhoa carambola
	hx_isotig12877	719	gi|255557437|ref|XP_002519749.1|	phytochrome B	1e-103	74.9	Ricinus communis
	hx_isotig43078	221	gi|85679505|gb|ABC72086.1|	phytochrome B	3e-34	95.89	Solanum tuberosum
	hx_isotig29731	436	gi|355483782|gb|AES64985.1|	Phytochrome B1	1e-35	75	Medicago truncatula
	hx_isotig11310	776	gi|183239018|gb|ACC60967.1|	phytochrome C	3e-47	77.24	Vitis vinifera
	hx_isotig21243	539	gi|183239018|gb|ACC60967.1|	phytochrome C	4e-67	76.16	Vitis vinifera
	hx_isotig16806	622	gi|183239026|gb|ACC60971.1|	phytochrome C	4e-74	67.92	Vitis riparia
	hx_isotig21243	539	gi|183239018|gb|ACC60967.1|	phytochrome C	4e-67	76.16	Vitis vinifera
	hx_isotig28961	446	gi|6715243|gb|AAF26343.1|AF190097_1	phytochrome C	3e-69	85.14	Nelumbo nucifera
	hx_isotig40707	279	gi|183239028|gb|ACC60972.1|	phytochrome E	9e-39	92.06	Vitis riparia
32	CRY (3)
	hx_isotig01777	1896	gi|340007733|gb|AEK26572.1|	cryptochrome 1.2	0	92.2	Populus tremula
	hx_isotig09980	829	gi|339777741|gb|AEK05708.1|	cryptochrome 1.2	2e-23	53.21	Populus balsamifera
	hx_HCPISSG01CEG44	485	gi|308803621|ref|XP_003079123.1|	cryptochrome-like protein 1	3e-67	72.97	Ostreococcus tauri
33	FHY3 (2)
	hx_HCPISSG02H15K5	292	gi|225464803|ref|XP_002268503.1|	transcription factor FHY3 (FAR-RED ELONGATED HYPOCOTYLS 3)	6e-28	57.73	Vitis vinifera
	hx_isotig04911	1206	gi|225464803|ref|XP_002268503.1|	transcription factor FHY3 (FAR-RED ELONGATED HYPOCOTYLS 3)	2e-98	53.08	Vitis vinifera
34	COP1 (2)
	hx_HCPISSG01D94KX	380	gi|255585740|ref|XP_002533551.1|	ubiquitin ligase protein cop1	1e-39	76	Ricinus communis
	hx_HCPISSG02G528O	282	gi|255575819|ref|XP_002528808.1|	ubiquitin ligase protein cop1	2e-20	68.12	Ricinus communis
35	COL (2)
	hx_isotig15139	644	gi|326415772|gb|ADZ72833.1|	Zinc finger protein CONSTANS-like protein	2e-48	78	Aquilegia formosa
	hx_isotig45722	130	gi|326415772|gb|ADZ72833.1|	Zinc finger protein CONSTANS-like protein	4e-06	60.87	Aquilegia formosa
Vernalization pathway
36	EMF2 (4)
	hx_isotig15798	642	gi|115511195|gb|ABI99481.1|	embryonic flower 2	2e-21	75	Acorus americanus
	hx_isotig38948	317	gi|90102224|gb|ABD85300.1|	embryonic flower 2	1e-28	84.06	Yucca filamentosa
	hx_HCPISSG01CBQKU	441	gi|115511195|gb|ABI99481.1|	embryonic flower 2	5e-15	56.41	Acorus americanus
	hx_isotig10471	810	gi|115511195|gb|ABI99481.1|	embryonic flower 2	6e-62	58.73	Acorus americanus
37	VIP (1)
	hx_isotig34847	377	gi|355525012|gb|AET05466.1|	Protein vip1	9e-39	66.39	Medicago truncatula
Gibberellic acid pathway
38	GA3 (2)
	hx_isotig09908	839	gi|190192212|dbj|BAG48320.1|	gibberellin 3-oxidase1	1e-74	83.97	Chrysanthemum × morifolium
	hx_isotig29647	436	gi|255040357|gb|ACT99991.1|	gibberellin 3-oxidase	2e-45	65.52	Malus x domestica
39	GAI (1)
	hx_isotig28936	446	gi|225445382|ref|XP_002284952.1|	PREDICTED: similar to DELLA protein	7e-33	54.11	Vitis vinifera
Ethylene biosynthesis pathway
40	ACC (4)
	hx_isotig43851	196	gi|343794772|gb|AEM62882.1|	ACC oxidase 4	2e-19	88	Actinidia deliciosa
	hx_isotig22912	517	gi|121488647|emb|CAI64499.1|	1-aminocyclopropane-1-carboxylate oxidase 1	3e-71	83.44	Prunus domestica subsp. insititia
	hx_isotig34508	384	gi|164430550|gb|ABY55589.1|	1-aminocyclopropane-1-carboxylate synthase	1e-40	75.42	Rosa hybrid cultivar
	hx_HCPISSG01CMCYM	377	gi|37030000|gb|AAQ88100.1|	1-aminocyclopropane-1-carboxylate synthase	1e-43	78.38	Rosa hybrid cultivar
41	ACS (1)
	hx_isotig18230	594	gi|74147576|gb|ABA00144.1|	ACS-like protein [Gossypium hirsutum]	1e-90	84.77	Gossypium hirsutum
42	SAMs (2)
	hx_HCPISSG02HWRUE	409	gi|241949987|ref|XP_002417716.1|	S-adenosylmethionine synthetase, putative; adomet synthetase	1e-43	77.78	Candida dubliniensis CD36
	hx_isotig00929	625	gi|255556550|ref|XP_002519309.1|	S-adenosylmethionine synthetase, putative	1e-37	96.15	Ricinus communis
43	EIL (1)
	hx_isotig16062	635	gi|266706186|gb|ACY78397.1|	ethylene insensitive 2 like	3e-33	69.86	Prunus persica
44	ERF (3)
	hx_isotig09201	871	gi|225443626|ref|XP_002279760.1|	ethylene responsive element binding factor 1	3e-58	75.51	Vitis vinifera
	hx_isotig14589	672	gi|225443626|ref|XP_002279760.1|	ethylene responsive element binding factor 1	2e-29	50.97	Vitis vinifera
	hx_isotig07188	1011	gi|62131147|gb|AAX68525.1|	ethylene responsive element binding factor 2	5e-43	51.16	Gossypium hirsutum
45	ETR (6)
	hx_isotig06441	1068	gi|17646113|gb|AAL40901.1|AF145972_1	ethylene receptor	1e-135	71.78	Petunia × hybrida
	hx_isotig08599	897	gi|163639429|gb|ABY28265.1|	ethylene receptor ETR2	3e-83	63.26	Actinidia deliciosa
	hx_isotig20379	555	gi|28571078|gb|AAN39380.2|	ethylene receptor	8e-34	86.57	Chrysanthemum × morifolium
	hx_isotig21690	531	gi|224115994|ref|XP_002332022.1|	ethylene receptor ETR7	9e-47	61.82	Populus trichocarpa
	hx_isotig27868	458	gi|187949883|gb|ACD43363.1|	ethylene receptor	6e-79	95.39	Paeonia suffruticosa
	hx_HCPISSG01BO27I	450	gi|18539224|dbj|BAB84570.1|	ethylene receptor	1e-62	89.33	Delphinium 'Magic Fountains Dark Blue'
Other genes of flower development
46	MADS (8)
	hx_isotig08175	270	gi|197310428|gb|ACH61565.1|	Truncated MADS-box transcription factor	4e-26	100	Pseudotsuga menziesii
	hx_isotig17932	599	gi|255562902|ref|XP_002522456.1|	Mads box protein, putative	1e-13	50.68	Ricinus communis
	hx_isotig26977	467	gi|225453843|ref|XP_002277773.1|	MADS-box protein	6e-53	85.27	Vitis vinifera
	hx_isotig27195	460	gi|32402436|gb|AAN52800.1|	MADS-box protein AGL62	5e-15	52.7	Arabidopsis thaliana
	hx_isotig31108	420	gi|342161739|gb|AEL16646.1|	MADS-box protein AGL15	1e-33	87.84	Dimocarpus longan
	hx_isotig36058	361	gi|343160577|emb|CAY39417.1|	MADS1 protein	1e-17	58.62	Aristolochia fimbriata
	hx_HCPISSG01C4AIY	489	gi|52789958|gb|AAU87582.1|	MADS9 protein	1e-23	50.59	Gossypium hirsutum
	hx_HCPISSG01E1H9R	393	gi|255539603|ref|XP_002510866.1|	Mads box protein, putative	1e-12	58.46	Ricinus communis
47	FT(2)
	hx_isotig04508	431	gi|269116064|gb|ACZ26523.1|	Flowering locus T	3e-25	83.33	Vitis vinifera
	hx_isotig13603	697	gi|302140575|gb|ADK95113.1|	Flowering locus T-like protein	2e-33	82.19	Gossypium hirsutum
48	SPL (4)
	hx_isotig25272	485	gi|255556564|ref|XP_002519316.1|	Squamosa promoter-binding protein, putative	4e-55	90.08	Ricinus communis
	hx_isotig38012	334	gi|255539362|ref|XP_002510746.1|	Squamosa promoter-binding protein, putative	3e-27	58.33	Ricinus communis
	hx_isotig13708	696	gi|295815790|gb|ADG36380.1|	Squamosa promoter-binding protein isoform SPL9	4e-25	67.82	Vitis vinifera
	hx_isotig06634	1055	gi|295815790|gb|ADG36380.1|	Squamosa promoter-binding protein isoform SPL9	1e-118	70.45	Vitis vinifera
