# Supplementary material for: Characterization of Flower-Bud Transcriptome and Development of Genic SSR Markers in Asian Lotus (Nelumbo nucifera Gaertn.)
Source: PLoS One. 2014 Nov 7;9(11):e112223. doi: 10.1371/journal.pone.0112223 (PMC4224446; doi:10.1371/journal.pone.0112223)
Supplement: Table S6 — Information on the three accessions of N. nucifera employed for deep transcriptome sequencing. (XLS) [file pone.0112223.s006.xls]

## Sheet: Sheet1
Table S6 Information on the three accessions of N. nucifera employed for deep transcriptome sequencing.
No	Accession name (ab.)	Species	Type	Use	Habitat	Place of collection	Voucher Specimen	Plant sizea	Flower formb	Flower color	No. of Stamenc	No. of Pistild
1	Honghu Honglian (HHRL)	N. nucifera	Wild	Flower lotus	Temperate	Chinese Waterlily World, Shandong, China	NU-063	Large	Single	Red	280-310	10-25
2	Tangzhaotisi Lian (TZTSL)	N. nucifera	Cultivar	Flower lotus	Temperate	Chinese Waterlily World, Shandong, China	NU-150	Large	Double	Red	200-250	10-25
3	Qianban Lian (QBL)	N. nucifera	Wild	Flower lotus	Temperate	Chenshan Botanical Garden, Shanghai, China	NU-300	Large	Thousand	Pink	0	0
Note: a Large indicates the plant taller than 120 cm [6]; b Single (equal to or less than 25 petals per flower with normal stamens and pistils), Double (more than 50 petals per flower, stamens are mostly petalodic), Thousand (usually over 1000 petals per flower, all stamens, pistils and carpel are petalodic, the flower is sterile) [6]; c,d The number of stamens and pistils were based on our inves…
